# Supplementary material
Source: PubMed Central journal article supplement (PMC7673470)

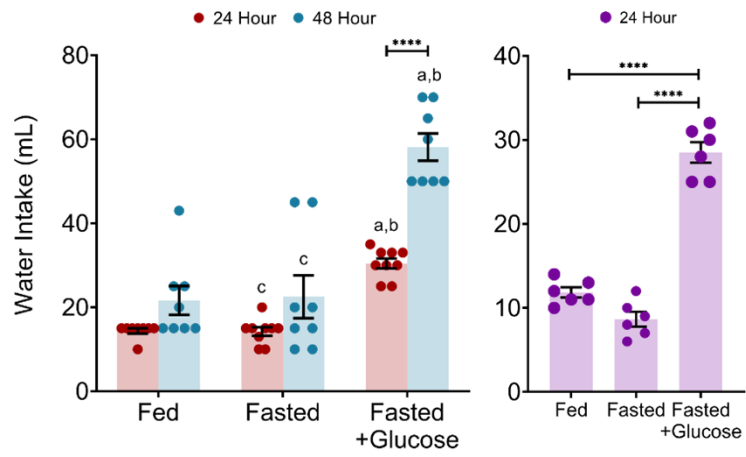

Supplement: NIHMS1641184-supplement-01.pdf [file NIHMS1641184-supplement-01.pdf]
